# Supplementary material for: A Novel Humanized Mouse Model for HIV and Tuberculosis Co-infection Studies
Source: PubMed Central journal article supplement — bioRxiv. 2024 Mar 7:2024.03.05.583545. Preprint. [Version 1] doi: 10.1101/2024.03.05.583545 (PMC10942347; doi:10.1101/2024.03.05.583545), 2024-03-07
Supplement: media-1.pdf [file media-1.pdf]

# Supplementary Materials

## Supplementary Figure 1: Gating strategy.

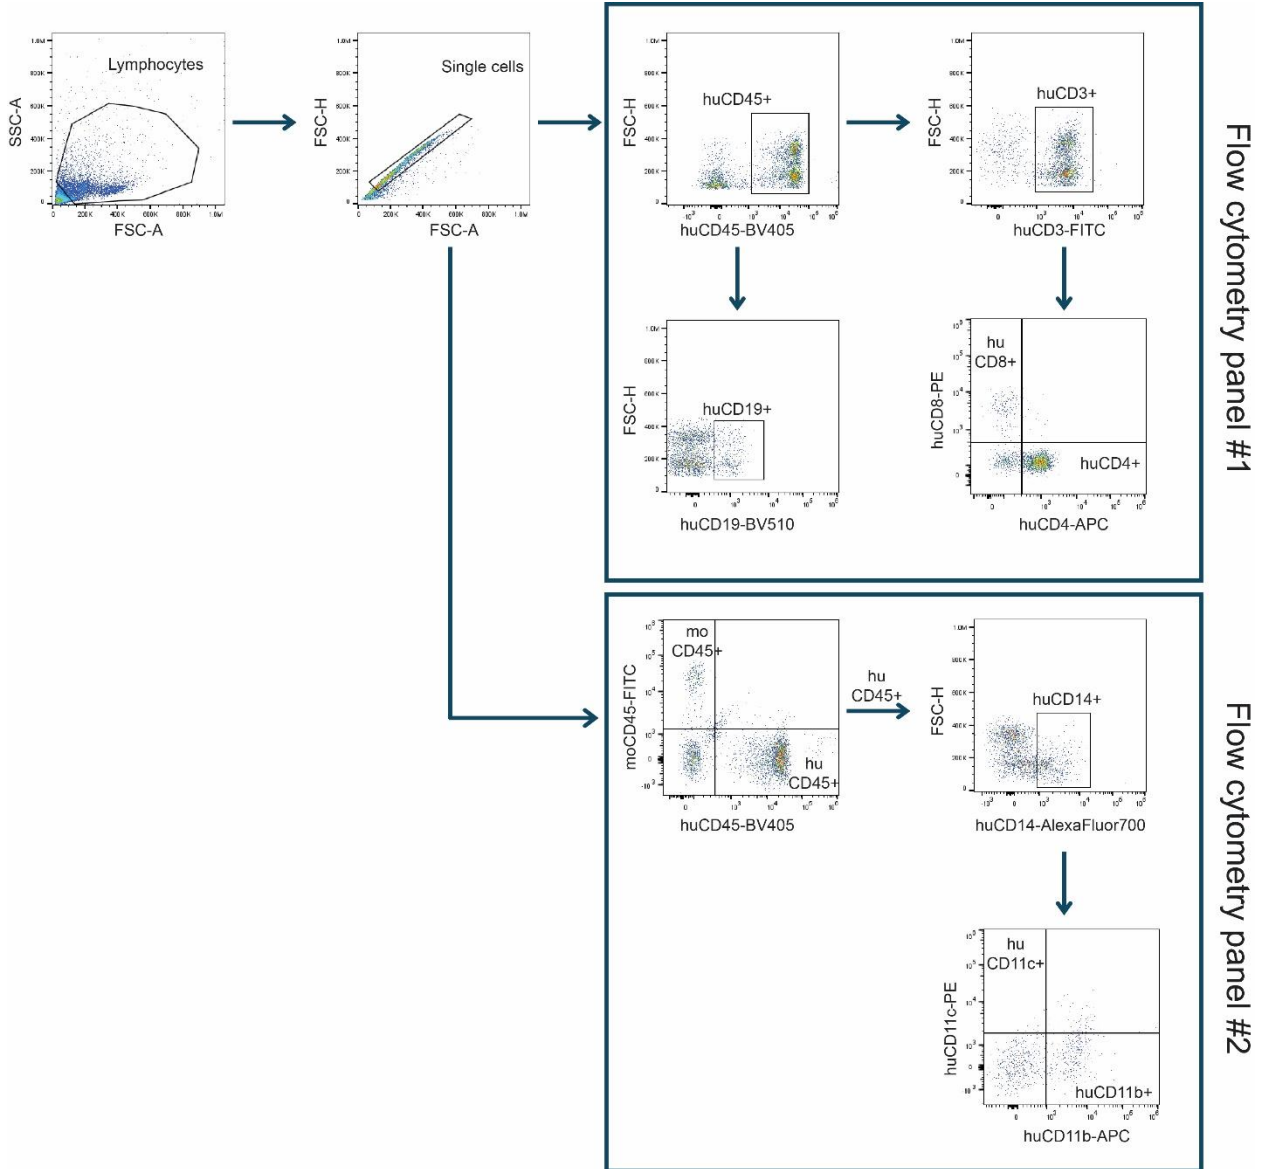

**Supplementary Figure 2:** Scatter plots showing Pearson correlation between Mtb load in mouse lungs and spleens (CFU/spleen).

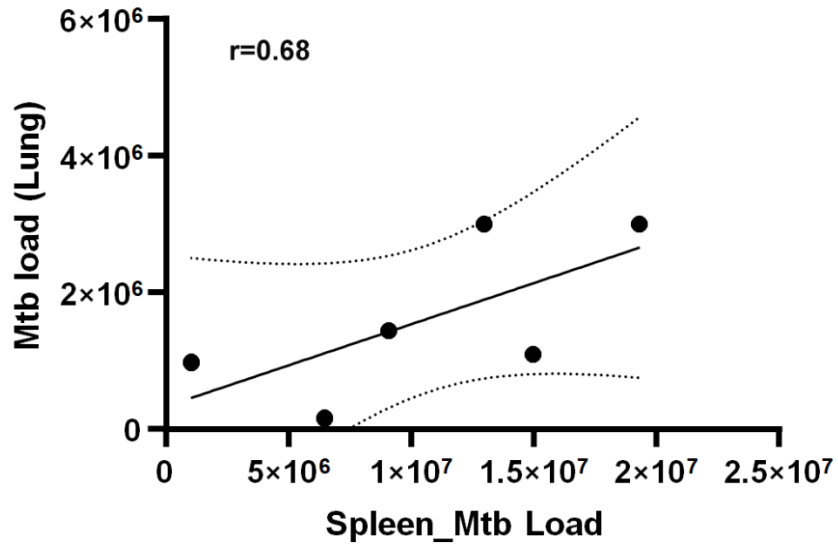

**Supplementary Table 1:** VIP scores computed for all the metabolites in the dataset based on OPLS-DA.

| <b>Metabolite</b>                    | <b>VIP score</b> |
|--------------------------------------|------------------|
| FA (16:0)                            | 1.437111         |
| N6 delta 2 isopentenyl adenine       | 1.434205         |
| S-Adenosylmethionine                 | 1.418893         |
| FA (12:0)                            | 1.415167         |
| FA (18:0)                            | 1.396659         |
| Platelet-activating factor           | 1.386854         |
| Lyso-PC (18:0)                       | 1.362849         |
| FA (14:0)                            | 1.350673         |
| FA (20:0)                            | 1.345078         |
| Deoxyuridine                         | 1.342263         |
| Carnitine                            | 1.33464          |
| Ascorbate                            | 1.308655         |
| 3-Hydroxybutyrate                    | 1.295623         |
| Tyrosine                             | 1.260681         |
| Indole-3-acrylate                    | 1.248672         |
| Lyso-PC (16:0)                       | 1.234492         |
| Indole-3-pyruvate                    | 1.218925         |
| 3-Hydroxycarnitine (5:0)             | 1.218571         |
| Deoxycarnitine                       | 1.21358          |
| PE (38:3)                            | 1.208569         |
| Creatine                             | 1.206018         |
| Acetylcholine                        | 1.205549         |
| 2-Hydroxyglutarate.Citramalate       | 1.201937         |
| N-alpha-Acetyllysine                 | 1.201507         |
| Gluconate                            | 1.197691         |
| Phenylalanine                        | 1.194949         |
| 4 Oxo-NAM                            | 1.187957         |
| Ribulose.Ribose.Xylulose_5.phosphate | 1.181456         |
| 6 Oxo-NAM                            | 1.179736         |
| FA (16:1)                            | 1.179513         |
| Pipecolate                           | 1.178893         |
| Dimethylglycine                      | 1.175609         |
| Pyridoxal                            | 1.174357         |
| Hexosamines                          | 1.170796         |
| Glucose                              | 1.170249         |
| PC (40:5)                            | 1.166408         |

|                                             |          |
|---------------------------------------------|----------|
| Tryptophan                                  | 1.161525 |
| Glutarate.Monoethylmalonate                 | 1.15544  |
| Lyso-PC (17:0)                              | 1.153914 |
| Diethanolamine                              | 1.153088 |
| Alanine.beta.Alanine                        | 1.151022 |
| Adipate.Methylglutarate.Monomethylglutarate | 1.147097 |
| Suberate                                    | 1.133155 |
| Isoleucine/Leucine                          | 1.131499 |
| .Fructose_6.phosphate.Galactose_1.phosphate | 1.127141 |
| Argininosuccinate                           | 1.125074 |
| Oxohexanoic acid                            | 1.124952 |
| Choline                                     | 1.121099 |
| FA_8.0 Octanoic acid                        | 1.109269 |
| 3-Hydroxymethylglutarate                    | 1.10777  |
| FA (20:2)                                   | 1.100887 |
| Glycerol_cyclic_phosphate                   | 1.099676 |
| Glycerophosphocholine                       | 1.096131 |
| Carnitinamide                               | 1.093773 |
| Asparagine                                  | 1.092705 |
| Azelaate                                    | 1.092398 |
| Citrate.Isocitrate                          | 1.09206  |
| 3-(2-Hydroxyphenyl)propanoate               | 1.088243 |
| Phosphoenolpyruvate                         | 1.077073 |
| Citrulline                                  | 1.076909 |
| Aspartate                                   | 1.071999 |
| Acetylacrylate                              | 1.070812 |
| Allothreonine.Homoserine.Threonine          | 1.069962 |
| PC (40:6)                                   | 1.066772 |
| PC (34:1)                                   | 1.05803  |
| Lyso-PC (18:1)                              | 1.055564 |
| Hydroxy-FA (7:0)                            | 1.054677 |
| Lyso-PE (16:0)                              | 1.046704 |
| SM (d18:1/16:0)                             | 1.044607 |
| N-Acetylorithine                            | 1.035736 |
| PC (34:2)                                   | 1.033627 |
| PE (38:4)                                   | 1.031127 |
| Pentoses                                    | 1.028832 |
| 3-Methoxy-4-hydroxymandelate                | 1.024757 |
| 4-Imidazoleacetate                          | 1.022081 |
| N,N-Dimethylarginine                        | 1.020195 |
| Glucose_6.phosphate.Mannose_6.phosphate     | 1.017318 |

|                                                                                           |          |
|-------------------------------------------------------------------------------------------|----------|
| Ornithine                                                                                 | 1.017197 |
| PC (32:0)                                                                                 | 1.013559 |
| Pyruvate                                                                                  | 1.002992 |
| PC (38:4)                                                                                 | 0.999385 |
| Homoarginine                                                                              | 0.999141 |
| Hexitols                                                                                  | 0.99771  |
| Methionine                                                                                | 0.995206 |
| Proline                                                                                   | 0.989876 |
| 5.Aminolevulinate.cis..trans.3.Hydroxyproline.cis.4.Hydroxyproline.trans.4.Hydroxyproline | 0.981924 |
| PC (36:5)                                                                                 | 0.975882 |
| Glutamine                                                                                 | 0.974746 |
| 5,6 Dimethylbenzimidazole                                                                 | 0.968548 |
| Lyso-PE (18:1)                                                                            | 0.967866 |
| Carnitine (18:1)                                                                          | 0.967755 |
| N,N-Dimethyllysine                                                                        | 0.966673 |
| Carnitine (3:0)                                                                           | 0.965    |
| Carnitine (16:1)                                                                          | 0.963095 |
| PC (40:8)                                                                                 | 0.957938 |
| Galacturonate.Hexarates                                                                   | 0.955387 |
| N,N,N-Trimethyllysine                                                                     | 0.953082 |
| 3,4-Dihydroxyphenylacetate                                                                | 0.949528 |
| Urate                                                                                     | 0.945383 |
| Carnosine                                                                                 | 0.94116  |
| PC (38:5)                                                                                 | 0.940501 |
| 4alpha-Hydroxyformyl-4beta-methyl-5alpha-cholest-8-en-3beta-ol                            | 0.938381 |
| Stachyose                                                                                 | 0.938214 |
| PE (38:6)                                                                                 | 0.937361 |
| PC (36:2)                                                                                 | 0.935478 |
| trans-Aconitate                                                                           | 0.935095 |
| FA (18:1)                                                                                 | 0.931431 |
| Aminocaprylate                                                                            | 0.924364 |
| Tartrate                                                                                  | 0.921061 |
| N-Acetylaspartate                                                                         | 0.920317 |
| Threonate                                                                                 | 0.914988 |
| PC (36:4)                                                                                 | 0.913867 |
| Lyso-PE (18:0)                                                                            | 0.911883 |
| Serine                                                                                    | 0.90743  |
| 2',4'-Dihydroxyacetophenone/Resorcinol monoacetate                                        | 0.906722 |
| Sulfolactate                                                                              | 0.905885 |
| Glutathione                                                                               | 0.905686 |
| Cystine                                                                                   | 0.901311 |

|                                            |          |
|--------------------------------------------|----------|
| PC (32:1)                                  | 0.897269 |
| Arginine                                   | 0.892206 |
| Diphthamide                                | 0.884566 |
| Raffinose                                  | 0.882656 |
| Myoinositol                                | 0.877701 |
| Malate                                     | 0.873186 |
| Urocanate                                  | 0.868794 |
| Lyso-PC (18:2)                             | 0.867252 |
| Methyl 4-aminobutyrate                     | 0.865099 |
| 3-Hydroxycarnitine (4:0)                   | 0.863005 |
| Theanine                                   | 0.855869 |
| Carnitine (16:0)                           | 0.849307 |
| Hydroxy-FA (10:0)                          | 0.849    |
| Quinate                                    | 0.840404 |
| Sedoheptulose 7-phosphate                  | 0.83466  |
| Ureidopropionate                           | 0.829667 |
| SM (d18:1/18:0)                            | 0.828499 |
| Anserine                                   | 0.824395 |
| Fumarate                                   | 0.812664 |
| Uracil                                     | 0.80356  |
| Oxadipate                                  | 0.79558  |
| Carnitine (glutaryl)                       | 0.788163 |
| 4-Guanidinobutanoate                       | 0.784761 |
| alpha-Ketoglutarate                        | 0.769371 |
| Methacholine                               | 0.769051 |
| Phosphorylcholine                          | 0.766295 |
| beta.Glycerophosphate.Glycerol_3.phosphate | 0.76434  |
| 2..3.Phosphoglycerate                      | 0.762515 |
| Hypotaurine                                | 0.762452 |
| PE (36:2)                                  | 0.750665 |
| S-Adenosylhomocysteine                     | 0.746779 |
| Quinolate                                  | 0.743582 |
| Deoxyribose                                | 0.741554 |
| Carnitine (18:0)                           | 0.737904 |
| Lyso-PE (20:4)                             | 0.71974  |
| Guanidinosuccinate                         | 0.718122 |
| Taurine                                    | 0.708903 |
| Fructose                                   | 0.706283 |
| Lactate                                    | 0.703849 |
| Carnitine (5:0)                            | 0.695629 |
| N-Acetylneuraminate                        | 0.693727 |

|                                                                   |          |
|-------------------------------------------------------------------|----------|
| Glutathione disulfide                                             | 0.682004 |
| Cellobiose.Lactose.Maltose.Melibiose.Palatinose.Sucrose.Trehalose | 0.674089 |
| 2-Hydroxy-4-(methylthio)butanoate                                 | 0.663318 |
| Glutamate                                                         | 0.656884 |
| Glu-Gln                                                           | 0.643373 |
| Hydroxy-FA (8:0)                                                  | 0.638001 |
| N-Acetylglutamate                                                 | 0.616066 |
| 2-Deoxyglucose                                                    | 0.610727 |
| Carnitine (4:0)                                                   | 0.591497 |
| PE (36:1)                                                         | 0.582848 |
| Stachydrine                                                       | 0.556746 |
| PC (32:2)                                                         | 0.547161 |
| Phosphoethanolamine                                               | 0.541491 |
| Dihydroxyacetone phosphate                                        | 0.455891 |
| Succinate                                                         | 0.436414 |
| N-Acetyls erine                                                   | 0.274851 |
